# Supplementary material
Source: PubMed Central journal article supplement (PMC6800092)
Supplement: NIHMS1054534-supplement-1.pdf [file NIHMS1054534-supplement-1.pdf]

SMCHD1 mutation spectrum for facioscapulohumeral muscular dystrophy type 2 (FSHD2) and *Bosma arhinia* microphthalmia syndrome (BAMS) reveals disease-specific localization of variants in the ATPase domain

Richard JLF Lemmers, PhD<sup>1\*</sup>, Nienke van der Stoep, PhD<sup>2</sup>, Patrick J van der Vliet, BSc<sup>1</sup>, Steven A Moore, PhD<sup>3</sup>, David San Leòn Granado, PhD<sup>1</sup>, Katherine Johnson, PhD<sup>4</sup>, Ana Topf, PhD<sup>4</sup>, Volker Straub, PhD<sup>4</sup>, Teresinha Evangelista, MD<sup>5</sup>, Tahseen Mozaffar, MD<sup>6</sup>, Virginia Kimonis, MD<sup>6</sup>, Rita Selvatici, PhD<sup>7</sup>, Alessandra Ferlini, MD, PhD<sup>7</sup>, Nicol C Voermans, MD, PhD<sup>8</sup>, Baziel van Engelen, MD, PhD<sup>8</sup>, Sabrina Sacconi, MD, PhD<sup>9</sup>, Rabi Tawil, MD<sup>10</sup>, Meindert H. Lamers, PhD<sup>11</sup>, Silvère M van der Maarel, PhD<sup>1\*</sup>

1 Department of Human Genetics, Leiden University Medical Center, Leiden, The Netherlands

2 Laboratory for Diagnostic Genome Analysis, Leiden University Medical Center, Leiden, The Netherlands

3 University of Iowa, Iowa City, IA, USA

4 Institute of Genetic Medicine, University of Newcastle, UK

5 Unité de Morphologie Neuromusculaire, Institut de Myologie, Paris, France

6 University of California, Irvine, CA, USA

7 Unit of Medical Genetics, University of Ferrara, Ferrara Italy

8 Department of Neurology, Donders Institute for Brain, Cognition and Behaviour, Radboud University Medical Center, Nijmegen, The Netherlands

9 Centre de référence des Maladies neuromusculaires, Nice University Hospital, Nice, France

10 Department of Neurology, University of Rochester Medical Center, Rochester, NY, USA

11 Department of Cell and Chemical Biology, Leiden University Medical Center, The Netherlands

\*corresponding author

Richard JLF Lemmers, PhD

Department of Human Genetics

Leiden University Medical Center

Leiden, The Netherlands

0031-71-5269481

Email: [r.j.l.f.lemmers@lumc.nl](mailto:r.j.l.f.lemmers@lumc.nl)

## **Supplementary Materials and Methods**

### Genetic analysis of D4Z4 repeats

Determination of the D4Z4 repeat size and allelic background was performed by Southern blotting and hybridization with probes p13E-11, 4qA and 4qB as described previously. Hybridization conditions slightly vary between the different laboratories. In our laboratory hybridization with probe p13E-11 was performed in a buffer with 10% Dextran sulphate, 1M NaCl, 50 mM Tris-HCl, pH 7.5, 1% SDS and 250ug/ml Salmon sperm DNA at 65°C. 4qA and 4qB hybridizations were done in a phosphate buffer with 10% polyethylene glycol 6000.<sup>1</sup>

Methylation at D4Z4 was determined either by Southern blotting at the FseI site in D4Z4 or by bisulphite conversion and PCR at the DR1 site.<sup>2</sup> For Southern blotting based methylation analysis with probe p13E-11 we used the hybridization buffer with 10% Dextran sulphate (see before). Calculations of repeat size corrected methylation compared to controls (delta1) and SMCHD1 pathogenic variant carriers (delta2) were done as described previously.<sup>3</sup>

### SMCHD1 sequencing and variant prediction

SMCHD1 variants were identified by Sanger sequencing or by whole exome or whole genome sequencing (WES/WGS) followed by confirmation using Sanger sequencing. All variants identified in FSHD2, BAMS and controls have been submitted to the Leiden Open Variation Database (LOVD, [www.lovd.nl](http://www.lovd.nl)). The putative effects of the SMCHD1 variants were investigated through prediction algorithms using Alamut Visual v.2.4.2 (Interactive Biosoftware, <https://www.interactive-biosoftware.com/alamut-visual/>) or Variant Effect Predictor (VEP) in Ensemble (<https://www.ensembl.org/info/docs/tools/vep/index.html>). This includes SIFT (Sorting Intolerant from Tolerant, <http://sift.jcvi.org>), Polyphen2 (<http://genetics.bwh.harvard.edu/pph2/>) and Align GVGD (Grantham Variation and Grantham Deviation, <http://agvgd.hci.utah.edu/about.php>). Splicing predictions were done in Alamut.

### Statistical analysis

The FseI methylation level, delta1 and delta2 methylation score (in Supplementary figure 2) were compared using the unpaired t-test in Graphpad Prism 7. For the comparisons shown in Supplementary table 4, we used a Pearson chi-square test with Yates' continuity correction in R 3.3.2. For the visualization, the R packages ggplot2 and trackViewer from R/Bioconductor were used.<sup>4</sup>

## Supplementary Tables

| nr | publication                                            | identified variants | new variants |
|----|--------------------------------------------------------|---------------------|--------------|
| 1  | Lemmers et al., 2012 (PMID: 23143600) <sup>8</sup>     | 15                  | 15           |
| 2  | Sacconi et al., 2013 (PMID: 24075187) <sup>13</sup>    | 3                   | 3            |
| 3  | Mitsuhashi et al., 2013 (PMID: 24128691) <sup>10</sup> | 1                   | 1            |
| 4  | Winston et al., 2015 (PMID: 24755953) <sup>15</sup>    | 1                   | 1            |
| 5  | Lemmers et al., 2015 (PMID: 25256356) <sup>3</sup>     | 51                  | 36           |
| 6  | Larsen et al., 2015 (PMID: 25370034) <sup>7</sup>      | 11                  | 11           |
| 7  | Smith et al., 2015 (poster ASHG 2015)                  | 8                   | 8            |
| 8  | Lemmers et al., 2015 (PMID: 25820463) <sup>9</sup>     | 2                   | 2            |
| 9  | Boogaard et al., 2016 (PMID: 25782668) <sup>14</sup>   | 5                   | 5            |
| 10 | Hamanaka et al., 2016 (PMID: 27061275) <sup>6</sup>    | 11                  | 11           |
| 11 | Gaillard et al., 2016 (PMID: 27634379) <sup>5</sup>    | 1                   | 1            |
| 12 | Nguyen et al., 2017 (PMID: 28744936) <sup>12</sup>     | 1                   | 1            |
| 13 | Mul et al., 2018 (PMID: 29980640) <sup>11</sup>        | 23                  | 6            |
|    |                                                        | Total               | 101          |

### Supplementary table 1

Chronological overview of 101 published SMCHD1 variants involved in FSHD2.<sup>3, 5-15</sup> Third column shows all variants described in the publication. Some variants were described in consecutive publications and overlap. In the last column we only mention the non-overlapping variants.

| 1   | 2      | 3   | 4   | 5                  | 6                       | 7                     | 8    | 9     | 10       | 11   | 12     | 13     | 14           | 15       | 16       | 17               | 18       | 19                       | 20                | 21  | 22  | 23  | 24         | 25                                 |
|-----|--------|-----|-----|--------------------|-------------------------|-----------------------|------|-------|----------|------|--------|--------|--------------|----------|----------|------------------|----------|--------------------------|-------------------|-----|-----|-----|------------|------------------------------------|
| ID  | Family | Nr  | M/F | cDNA (NM 015295.2) | gene (hg19 (GRCh37.p5)) | protein (NP_056110.2) | type | ORF   | position | Fsel | delta1 | delta2 | dbSNP        | AFR      | EUR      | Allele Frequency | SAS      | Ensemble                 | Alamut            | VG1 | GV  | GD  | Prediction | Publication                        |
| F1  | R1871  | 1   | M   | c.101G>C           | g.2656175G>C            | R34P                  | M    | P-ORF | exon 1   | 11   | -37    | -3     |              |          |          |                  |          | probably_damaging(0.969) | Deleterious(0)    | C0  | 241 | 40  | 2          |                                    |
| F2  | LOVD12 | 1   | M   | c.311A>G           | g.2666917A>G            | N104S                 | M    | P-ORF | exon 3   | NA   | NA     | NA     | rs375795924  | 1.13E-04 | 7.99E-05 | 8.38E-04         | 0        | benign(0)                | Tolerated(0.13)   | C0  | 223 | 0   | 0          | ASHG conference 2015 (Smith, 2015) |
| F3  | Rf6    | 30  | F   | c.320T>C           | g.2666926T>C            | L107P                 | M    | P-ORF | exon 3   | 3    | -36    | -6     | rs1135402737 |          |          |                  |          | probably_damaging(0.998) | Deleterious(0)    | C65 | 0   | 98  | 3          | PMID: 29980640 (Mul, 2018)         |
| F4  | LOVD11 | 1   | M   | c.328G>A           | g.2666934G>A            | A110T                 | M    | P-ORF | exon 3   | NA   | NA     | NA     |              |          |          |                  |          | possibly_damaging(0.865) | Deleterious(0.01) | C0  | 27  | 37  | 2          | PMID:25370034 (Larsen, 2014)       |
| F5  | Rf866  | 1   | M   | c.410G>A           | g.2667016G>A            | G137E                 | M    | P-ORF | exon 3   | 22   | -21    | 10     | rs1057519644 |          |          |                  |          | probably_damaging(0.989) | Deleterious(0.01) | C0  | 79  | 30  | 2          | PMID: 25256356 (Lemmers, HMG 2015) |
| F6  | LOVD21 | 1   | M   | c.448G>C           | g.2673303G>C            | D150H                 | M    | P-ORF | exon 4   | NA   | NA     | NA     |              |          |          |                  |          | probably_damaging(1)     | Deleterious(0)    | C65 | 0   | 81  | 3          | ASHG conference 2015 (Smith, 2015) |
| F7  | Rf1685 | 1   | M   | c.562G>A           | g.2674068G>A            | G188R                 | M    | P-ORF | exon 5   | 6    | NA     | NA     |              |          |          |                  |          | probably_damaging(1)     | Deleterious(0)    | C65 | 0   | 125 | 3          |                                    |
| F8  | LOVD23 | 1   | M   | c.565A>G           | g.2674071A>G            | M189V                 | M    | P-ORF | exon 5   | NA   | NA     | NA     |              |          |          |                  |          | probably_damaging(0.977) | Deleterious(0)    | C15 | 0   | 21  | 2          | ASHG conference 2015 (Smith, 2015) |
| F9  | Rf1142 | 1   | M   | c.580C>T           | g.2674086C>T            | L194F                 | M    | P-ORF | exon 5   | 12   | -28    | 2      |              |          |          |                  |          | probably_damaging(0.999) | Deleterious(0)    | C15 | 0   | 22  | 2          | PMID: 25256356 (Lemmers, HMG 2015) |
| F10 | Rf677  | 1   | M   | c.610A>G           | g.2674116A>G            | K204E                 | M    | P-ORF | exon 5   | 6    | -32    | -4     | rs1184311800 |          |          |                  |          | possibly_damaging(0.851) | Deleterious(0)    | C55 | 0   | 57  | 3          | PMID: 29980640 (Mul, 2018)         |
| F11 | IW1    | 2   | M   | c.724G>G           | g.2688477G>A            | A242T                 | M    | P-ORF | exon 6   | 14   | NA     | NA     |              |          |          |                  |          | probably_damaging(0.959) | Deleterious(0)    | C55 | 0   | 58  | 3          | PMID: 29980640 (Mul, 2018)         |
| F12 | Rf1247 | 1   | F   | c.787C>G           | g.2688659C>G            | H263D                 | M    | P-ORF | exon 7   | 4    | -34    | -5     |              |          |          |                  |          | probably_damaging(0.996) | Deleterious(0)    | C55 | 0   | 81  | 3          | PMID: 25256356 (Lemmers, HMG 2015) |
| F13 | Rf2542 | 1   | M   | c.790G>A           | g.2688962G>A            | E254K                 | M    | P-ORF | exon 7   | 6    | -33    | -4     |              |          |          |                  |          | probably_damaging(0.996) | Deleterious(0)    | C55 | 22  | 192 | 3          | PMID: 27061275 (Hamanaka, 2016)    |
| F14 | LOVD36 | 1   | F   | c.848A>G           | g.2688720A>G            | Y283C                 | M    | P-ORF | exon 7   | 4    | NA     | NA     | rs886041921  |          |          |                  |          | probably_damaging(0.996) | Deleterious(0)    | C55 | 22  | 192 | 3          |                                    |
| F15 | Rf294  | 2   | F   | c.848A>G           | g.2688720A>G            | Y283C                 | M    | P-ORF | exon 7   | 5    | -37    | -6     | rs886041921  |          |          |                  |          | probably_damaging(0.996) | Deleterious(0)    | C55 | 22  | 192 | 3          |                                    |
| F16 | IW20   | 1   | M   | c.1031G>A          | g.2694682G>A            | R344Q                 | M    | P-ORF | exon 9   | 24   | NA     | NA     | rs370983669  | 4.11E-04 | 3.02E-05 | 0                | 0        | benign(0.031)            | Deleterious(0)    | C35 | 0   | 43  | 3          |                                    |
| F17 | Rf742  | 1   | M   | c.1058A>G          | g.2697047A>G            | Y353C                 | M    | P-ORF | exon 9   | 9    | -41    | -6     |              |          |          |                  |          | probably_damaging(0.997) | Deleterious(0)    | C65 | 0   | 194 | 3          | PMID: 23143600 (Lemmers, 2010)     |
| F18 | Rf959  | 3   | M   | c.1058A>G          | g.2697047A>G            | Y353C                 | M    | P-ORF | exon 9   | 12   | NA     | NA     |              |          |          |                  |          | probably_damaging(0.997) | Deleterious(0)    | C65 | 0   | 194 | 3          | PMID: 25256356 (Lemmers, HMG 2015) |
| F19 | Rf1196 | 1   | F   | c.1273G>G          | g.2697970G>A            | G425R                 | M    | P-ORF | exon 10  | 1    | -37    | -8     |              |          |          |                  |          | probably_damaging(0.925) | Deleterious(0)    | C65 | 0   | 125 | 3          | PMID: 25256356 (Lemmers, HMG 2015) |
| F20 | IW35   | 1   | M   | c.1273G>A          | g.2697970G>A            | G425R                 | M    | P-ORF | exon 10  | 17   | NA     | NA     |              |          |          |                  |          | probably_damaging(0.955) | Deleterious(0)    | C65 | 0   | 125 | 3          |                                    |
| F21 | IW39   | 1   | M   | c.1282C>T          | g.2697979C>T            | R428C                 | M    | P-ORF | exon 10  | 14   | NA     | NA     |              |          |          |                  |          | probably_damaging(0.996) | Deleterious(0)    | C65 | 0   | 179 | 3          |                                    |
| F22 | LOVD1  | 1   | M   | c.1433G>A          | g.2700627G>A            | G478E                 | M    | P-ORF | exon 11  | 12   | NA     | NA     |              |          |          |                  |          | benign(0.142)            | Deleterious(0)    | C65 | 0   | 98  | 2          | PMID:25370034 (Larsen, 2014)       |
| F23 | Rf739  | 1   | M   | c.1436G>C          | g.2700630G>C            | R479P                 | M    | P-ORF | exon 11  | 10   | -32    | -1     |              |          |          |                  |          | probably_damaging(0.997) | Deleterious(0)    | C65 | 0   | 103 | 3          | PMID: 23143600 (Lemmers, 2010)     |
| F24 | Rf2377 | 1   | M   | c.1436G>G          | g.2700630G>T            | R479L                 | M    | P-ORF | exon 11  | 13   | -31    | 1      |              |          |          |                  |          | probably_damaging(0.995) | Deleterious(0)    | C65 | 0   | 102 | 3          | PMID: 23143600 (Lemmers, 2010)     |
| F25 | Rf2456 | 1   | M   | c.1436G>G          | g.2700630G>A            | R479Q                 | M    | P-ORF | exon 11  | 2    | -48    | -13    |              |          |          |                  |          | probably_damaging(0.992) | Deleterious(0)    | C35 | 0   | 43  | 3          |                                    |
| F26 | Rf300  | 1   | M   | c.1474T>C          | g.2700743T>C            | C492R                 | M    | P-ORF | exon 12  | 7    | -29    | -2     |              |          |          |                  |          | probably_damaging(0.996) | Deleterious(0)    | C65 | 0   | 180 | 3          | PMID: 23143600 (Lemmers, 2010)     |
| F27 | Rf1729 | 1   | F   | c.1556T>C          | g.2700825T>C            | F519S                 | M    | P-ORF | exon 12  | 11   | -31    | -1     |              |          |          |                  |          | probably_damaging(0.994) | Deleterious(0)    | C65 | 0   | 155 | 3          | PMID: 29980640 (Mul, 2018)         |
| F28 | Rf1021 | 1   | M   | c.1580C>T          | g.2700849C>T            | T527M                 | M    | P-ORF | exon 12  | 18   | -25    | 6      | rs397518422  |          |          |                  |          | probably_damaging(0.992) | Deleterious(0)    | C0  | 78  | 52  | 2          | PMID: 24075187 (Sacconi, 2013)     |
| F29 | IW31   | 1   | M   | c.1652A>G          | g.2703694A>G            | Q551R                 | M    | P-ORF | exon 13  | 15   | NA     | NA     |              |          |          |                  |          | probably_damaging(0.968) | Deleterious(0.03) | C0  | 53  | 5   | 2          |                                    |
| F30 | Rf2572 | 1   | M   | c.1786T>G          | g.2703828T>G            | W596G                 | M    | P-ORF | exon 13  | 10   | -21    | 3      |              |          |          |                  |          | probably_damaging(0.994) | Deleterious(0)    | C65 | 0   | 184 | 3          |                                    |
| F31 | LOVD5  | 1   | F   | c.1844T>A          | g.2705693T>A            | V815D                 | M    | P-ORF | exon 14  | 17   | NA     | NA     |              |          |          |                  |          | probably_damaging(0.996) | Deleterious(0)    | C65 | 0   | 152 | 3          | PMID:25370034 (Larsen, 2014)       |
| F32 | IW8    | 1   | F   | c.1865C>T          | g.2705714C>T            | P622L                 | M    | P-ORF | exon 14  | 8    | NA     | NA     |              |          |          |                  |          | probably_damaging(0.997) | Deleterious(0)    | C65 | 0   | 98  | 3          |                                    |
| F33 | IW11   | 1   | F   | c.192T>G           | g.2705770G>T            | V641L                 | M    | P-ORF | exon 14  | 16   | NA     | NA     | rs377559548  | 0        | 1.51E-05 | 0                | 0        | benign(0.079)            | Deleterious(0.03) | C0  | 29  | 5   | 1          |                                    |
| F34 | Rf999  | 3   | F   | c.206T>C           | g.2707585C>T            | P890S                 | M    | P-ORF | exon 16  | 7    | -28    | -1     | rs397514623  |          |          |                  |          | probably_damaging(0.996) | Deleterious(0)    | C65 | 0   | 73  | 3          | PMID: 23143600 (Lemmers, 2010)     |
| F35 | Rf917  | 1   | M   | c.224T>C           | g.2707911T>C            | L749P                 | M    | P-ORF | exon 17  | 11   | -36    | -3     |              |          |          |                  |          | probably_damaging(0.905) | Deleterious(0)    | C45 | 14  | 87  | 3          | PMID: 25256356 (Lemmers, HMG 2015) |
| F36 | Rf1857 | 1   | M   | c.2321A>G          | g.2718216A>G            | Y774C                 | M    | P-ORF | exon 18  | 6    | NA     | NA     |              |          |          |                  |          | probably_damaging(0.921) | Deleterious(0.01) | C25 | 102 | 155 | 3          |                                    |
| F37 | Rf676  | 1   | F   | c.2545G>A          | g.2722693G>A            | D849N                 | M    | P-ORF | exon 20  | 5    | -37    | -6     |              |          |          |                  |          | probably_damaging(0.996) | Deleterious(0)    | C15 | 0   | 23  | 2          | PMID: 23143600 (Lemmers, 2010)     |
| F38 | Rf1432 | 1   | F   | c.2768T>C          | g.2728517T>C            | L923P                 | M    | P-ORF | exon 22  | 5    | NA     | NA     |              |          |          |                  |          | probably_damaging(0.942) | Deleterious(0)    | C0  | 112 | 53  | 2          |                                    |
| F39 | Rf1492 | 1   | M   | c.2932T>A          | g.2729292T>A            | L978H                 | M    | P-ORF | exon 24  | 14   | -28    | 3      |              |          |          |                  |          | probably_damaging(0.998) | Deleterious(0)    | C0  | 235 | 89  | 2          |                                    |
| F40 | Rf385  | 101 | M   | c.2941T>G          | g.2729300T>G            | Y981D                 | M    | P-ORF | exon 24  | 21   | -24    | 8      |              |          |          |                  |          | benign(0.158)            | Deleterious(0)    | C35 | 56  | 140 | 2          | PMID: 27153398 (Boogaard, 2016)    |
| F41 | LOVD17 | 1   | M   | c.318T>G           | g.2732401G>C            | G1063R                | M    | P-ORF | exon 25  | NA   | NA     | NA     |              |          |          |                  |          | probably_damaging(0.999) | Deleterious(0)    | C65 | 0   | 125 | 3          | ASHG conference 2015 (Smith, 2015) |
| F42 | LOVD20 | 1   | M   | c.332T>C           | g.2738441T>C            | L1108P                | M    | P-ORF | exon 26  | NA   | NA     | NA     |              |          |          |                  |          | possibly_damaging(0.888) | Deleterious(0.05) | C15 | 106 | 80  | 2          | ASHG conference 2015 (Smith, 2015) |
| F43 | IW3    | 1   | M   | c.3340G>A          | g.2738458G>A            | V1114I                | M    | P-ORF | exon 26  | 10   | NA     | NA     | rs778206654  | 0        | 1.13E-04 | 0                | 5.80E-04 | probably_damaging(0.956) | Deleterious(0)    | C25 | 0   | 29  | 3          |                                    |
| F44 | Rf1659 | 1   | F   | c.3811G>T          | g.2747529G>T            | I1271L                | M    | P-ORF | exon 30  | 18   | NA     | NA     |              |          |          |                  |          | benign(0.087)            | Deleterious(0)    | C25 | 0   | 31  | 2          |                                    |
| F45 | Rf1430 | 1   | F   | c.3899T>A          | g.2747617T>A            | I1300K                | M    | P-ORF | exon 30  | 13   | NA     | NA     | rs764012354  | 0        | 2.43E-05 | 0                | 0        | probably_damaging(0.986) | Deleterious(0)    | C35 | 29  | 91  | 3          |                                    |
| F46 | LOVD7  | 1   | F   | c.4388A>C          | g.2760691A>C            | Q1463P                | M    | P-ORF | exon 35  | 13   | NA     | NA     |              |          |          |                  |          | probably_damaging(0.969) | Deleterious(0)    | C65 | 0   | 75  | 3          | PMID:25370034 (Larsen, 2014)       |
| F47 | Rf1126 | 204 | F   | c.4404G>A          | g.2760707G>A            | M1468I                | M    | P-ORF | exon 35  | 13   | -29    | 1      |              |          |          |                  |          | benign(0)                | Tolerated(0.64)   | C0  | 163 | 0   | 0          | PMID: 25256356 (Lemmers, HMG 2015) |
| F48 | LOVD8  | 1   | M   | c.4454C>T          | g.2762122C>T            | P1485L                | M    | P-ORF | exon 36  | 18   | NA     | NA     |              |          |          |                  |          | probably_damaging(0.996) | Deleterious(0)    | C15 | 99  | 94  | 2          | PMID:25370034 (Larsen, 2014)       |
| F49 | Rf683  | 1   | F   | c.4661T>C          | g.2763297T>C            | F1554S                | M    | P-ORF | exon 37  | 11   | -27    | 1      |              |          |          |                  |          | possibly_damaging(0.477) | Deleterious(0)    | C65 | 0   | 155 | 3          | PMID: 23143600 (Lemmers, 2010)     |
| F50 | Rf1853 | 1   | M   | c.5249A>G          | g.2775805A>G            | D1750G                | M    | P-ORF | exon 42  | 5    | -27    | -2     |              |          |          |                  |          | probably_damaging(0.999) | Deleterious(0)    | C65 | 0   | 94  | 3          |                                    |
| F51 | IW23   | 1   | M   | c.5249A>T          | g.2775805A>T            | D1750V                | M    | P-ORF | exon 42  | 12   | NA     | NA     |              |          |          |                  |          | probably_damaging(0.999) | Deleterious(0)    | C65 | 0   | 152 | 3          |                                    |
| F52 | IW6    | 1   | M   | c.5337A>G          | g.2778227A>G            | Y1846C                | M    | P-ORF | exon 44  | 11   | NA     | NA     |              |          |          |                  |          | probably_damaging(0.998) | Deleterious(0)    | C65 | 0   | 194 | 3          |                                    |
| F53 | Rf385  | 102 | F   | c.5598C>G          | g.2784498C>G            | R1866G                | M    | P-ORF | exon 45  | 10   | -31    | -1     |              |          |          |                  |          | probably_damaging(0.995) | Deleterious(0)    | C65 | 0   | 125 | 3          | PMID: 27153398 (Boogaard, 2016)    |
| F54 | Rf1807 | 1   | M   | c.5597G>A          | g.2784497G>A            | R1866Q                | M    | P-ORF | exon 45  | 14   | -28    | 3      | rs886044586  |          |          |                  |          | probably_damaging(0.992) | Deleterious(0)    | C35 | 0   | 43  | 3          |                                    |
| F55 | Rf975  | 201 | F   | c.244del           | g.2656098del            |                       | D    | D-ORF | exon 1   | 15   | -38    | -1     |              |          |          |                  |          |                          |                   |     |     |     |            | PMID: 25256356 (Lemmers, HMG 2015) |
| F56 | IW10   | 1   | F   | c.173 174insCT     | g.2656247_2656248insCT  |                       | D    | D-ORF | exon 1   | 19   | NA     | NA     |              |          |          |                  |          |                          |                   |     |     |     |            |                                    |
| F57 | Rf743  | 1   | M   | c.182 183dup       | g.2656256_2656257dup    |                       | D    | D-ORF | exon 1   | 14   | -30    | 2      |              |          |          |                  |          |                          |                   |     |     |     |            |                                    |
| F58 | Rf1472 | 1   | M   | c.182 183dup       | g.2656256_2             |                       |      |       |          |      |        |        |              |          |          |                  |          |                          |                   |     |     |     |            |                                    |



| ID   | Family | Nr  | SMCHD1                    | SMCHD1                       | SMCHD1                | type | ORF   | position  | Fsel | delta1 | delta2 | dbSNP        | AFR | EUR | EAS | SAS | Ensemble                 | Alamut          | AGVGD (3) | GV  | GD  | Total (1+2+3) | Publication                        |                                         |
|------|--------|-----|---------------------------|------------------------------|-----------------------|------|-------|-----------|------|--------|--------|--------------|-----|-----|-----|-----|--------------------------|-----------------|-----------|-----|-----|---------------|------------------------------------|-----------------------------------------|
|      |        |     | cDNA (NM 015295.2)        | gene (hg19 (GRCh37.p5)       | protein (NP 056110.2) |      |       |           |      |        |        |              |     |     |     |     | PolyPhen (1)             | SIFT(2)         |           |     |     | Prediction    |                                    |                                         |
| F3   | R16    | 265 | F c.320T>C                | q.266926T>C                  | L107P                 | M    | P-ORF | exon 3    | 13   | -38    | -2     | rs1135402737 |     |     |     |     | probably_damaging(0.998) | Deleterious(0)  | C65       | 0   | 98  | 3             | PMID: 29980640 (Mul, 2018)         |                                         |
| F3   | R16    | 52  | F c.320T>C                | q.266926T>C                  | L107P                 | M    | P-ORF | exon 3    | 11   | -34    | -2     | rs1135402737 |     |     |     |     | probably_damaging(0.998) | Deleterious(0)  | C65       | 0   | 98  | 3             | PMID: 29980640 (Mul, 2018)         |                                         |
| F3   | R16    | 262 | M c.320T>C                | q.266926T>C                  | L107P                 | M    | P-ORF | exon 3    | 7    | -36    | -5     | rs1135402737 |     |     |     |     | probably_damaging(0.998) | Deleterious(0)  | C65       | 0   | 98  | 3             | PMID: 29980640 (Mul, 2018)         |                                         |
| F3   | R16    | 37  | F c.320T>C                | q.266926T>C                  | L107P                 | M    | P-ORF | exon 3    | 6    | -35    | -5     | rs1135402737 |     |     |     |     | probably_damaging(0.998) | Deleterious(0)  | C65       | 0   | 98  | 3             | PMID: 29980640 (Mul, 2018)         |                                         |
| F3   | R16    | 53  | M c.320T>C                | q.266926T>C                  | L107P                 | M    | P-ORF | exon 3    | 7    | -39    | -6     | rs1135402737 |     |     |     |     | probably_damaging(0.998) | Deleterious(0)  | C65       | 0   | 98  | 3             | PMID: 29980640 (Mul, 2018)         |                                         |
| F3   | R16    | 51  | F c.320T>C                | q.266926T>C                  | L107P                 | M    | P-ORF | exon 3    | 3    | -42    | -10    | rs1135402737 |     |     |     |     | probably_damaging(0.998) | Deleterious(0)  | C65       | 0   | 98  | 3             | PMID: 29980640 (Mul, 2018)         |                                         |
| F12  | IW1    | 1   | F c.724G>A                | q.2688477G>A                 | A242T                 | M    | P-ORF | exon 6    | 19   | NA     | NA     |              |     |     |     |     | probably_damaging(0.999) | Deleterious(0)  | C55       | 0   | 58  | 3             | PMID: 29980640 (Mul, 2018)         |                                         |
| F18  | Rf742  | 4   | M c.1058A>G               | q.2697047A>G                 | Y353C                 | M    | P-ORF | exon 9    | 9    | -42    | -6     |              |     |     |     |     | probably_damaging(0.997) | Deleterious(0)  | C65       | 0   | 194 | 3             | PMID: 23143600 (Lemmers, 2010)     |                                         |
| F28  | Rf1021 | 3   | M c.1580C>T               | q.2700849C>T                 | T527M                 | M    | P-ORF | exon 12   | 11   | -27    | 1      | rs397518422  |     |     |     |     | probably_damaging(0.992) | Deleterious(0)  | C0        | 78  | 52  | 2             | PMID: 24075187 (Sacconi, 2013)     |                                         |
| F28  | Rf1021 | 2   | F c.1580C>T               | q.2700849C>T                 | T527M                 | M    | P-ORF | exon 12   | 24   | -25    | 10     | rs397518422  |     |     |     |     | probably_damaging(0.992) | Deleterious(0)  | C0        | 78  | 52  | 2             | PMID: 24075187 (Sacconi, 2013)     |                                         |
| F34  | Rf399  | 2   | F c.2068C>T               | q.2707565C>T                 | P690S                 | M    | P-ORF | exon 16   | 10   | -30    | -1     | rs397514623  |     |     |     |     | probably_damaging(0.996) | Deleterious(0)  | C65       | 0   | 73  | 3             | PMID: 23143600 (Lemmers, 2010)     |                                         |
| F40  | Rf385  | 203 | M c.2941T>G and c.5596C>G | q.272930T>G and q.2784496C>G | Y981D                 | M    | P-ORF | exon 24   | 5    | -38    | -7     |              |     |     |     |     | benign(0.158)            | Deleterious(0)  | C35       | 56  | 140 | 2             | PMID: 27153398 (Boogaard, 2016)    |                                         |
| F40  | Rf385  | 206 | F c.2941T>G and c.5596C>G | q.272930T>G and q.2784496C>G | Y981D                 | M    | P-ORF | exon 24   | 1    | -37    | -9     |              |     |     |     |     | benign(0.158)            | Deleterious(0)  | C35       | 56  | 140 | 2             | PMID: 27153398 (Boogaard, 2016)    |                                         |
| F47  | Rf1126 | 205 | M c.4404G>A               | q.2760707G>A                 | M1468I                | M    | P-ORF | exon 35   | 12   | -35    | -1     |              |     |     |     |     | benign(0)                | Tolerated(0.64) | C0        | 163 | 0   | 0             | PMID: 25256356 (Lemmers, HMG 2015) |                                         |
| F47  | Rf1126 | 208 | F c.4404G>A               | q.2760707G>A                 | M1468I                | M    | P-ORF | exon 35   | 22   | -34    | 5      |              |     |     |     |     | benign(0)                | Tolerated(0.64) | C0        | 163 | 0   | 0             | PMID: 25256356 (Lemmers, HMG 2015) |                                         |
| F55  | Rf975  | 101 | M c.244del                | q.2656098del                 |                       | D    | D-ORF | exon 1    | 27   | -26    | 11     |              |     |     |     |     |                          |                 |           |     |     |               |                                    | PMID: 25256356 (Lemmers, HMG 2015)      |
| F55  | Rf975  | 301 | F c.244del                | q.2656098del                 |                       | D    | D-ORF | exon 1    | 13   | -38    | -3     |              |     |     |     |     |                          |                 |           |     |     |               |                                    | PMID: 25256356 (Lemmers, HMG 2015)      |
| F55  | Rf975  | 302 | F c.244del                | q.2656098del                 |                       | D    | D-ORF | exon 1    | 13   | -36    | -1     |              |     |     |     |     |                          |                 |           |     |     |               |                                    | PMID: 25256356 (Lemmers, HMG 2015)      |
| F57  | Rf743  | 2   | F c.182_183dup            | q.2656256_2656257dup         |                       | D    | D-ORF | exon 1    | 12   | -34    | -1     |              |     |     |     |     |                          |                 |           |     |     |               |                                    |                                         |
| F57  | Rf743  | 5   | F c.182_183dup            | q.2656256_2656257dup         |                       | D    | D-ORF | exon 1    | 9    | -31    | -1     |              |     |     |     |     |                          |                 |           |     |     |               |                                    |                                         |
| F57  | Rf743  | 4   | M c.182_183dup            | q.2656256_2656257dup         |                       | D    | D-ORF | exon 1    | 17   | -26    | 5      |              |     |     |     |     |                          |                 |           |     |     |               |                                    |                                         |
| F60  | Rf1101 | 1   | M c.582dupT               | q.2674088dup                 |                       | N    | D-ORF | exon 5    | 11   | -28    | 1      |              |     |     |     |     |                          |                 |           |     |     |               |                                    |                                         |
| F67  | Rf1033 | 2   | F c.1302_1306delTGA       | q.2697999_2698003del         |                       | D    | D-ORF | exon 10   | 10   | -22    | 3      | rs387907319  |     |     |     |     |                          |                 |           |     |     |               |                                    | PMID: 25256356 (Lemmers, HMG 2015)      |
| F69  | Rf393  | 101 | M c.1608del               | q.2700875del                 |                       | D    | D-ORF | exon 12   | 12   | -38    | -3     |              |     |     |     |     |                          |                 |           |     |     |               |                                    | PMID: 23143600 (Lemmers, 2010)          |
| F69  | Rf393  | 302 | F c.1608del               | q.2700875del                 |                       | D    | D-ORF | exon 12   | 19   | -35    | 2      |              |     |     |     |     |                          |                 |           |     |     |               |                                    | PMID: 23143600 (Lemmers, 2010)          |
| F69  | Rf393  | 303 | M c.1608del               | q.2700875del                 |                       | D    | D-ORF | exon 12   | 19   | -26    | 6      |              |     |     |     |     |                          |                 |           |     |     |               |                                    | PMID: 23143600 (Lemmers, 2010)          |
| F69  | Rf393  | 305 | M c.1608del               | q.2700875del                 |                       | D    | D-ORF | exon 12   | 21   | -33    | 4      |              |     |     |     |     |                          |                 |           |     |     |               |                                    | PMID: 23143600 (Lemmers, 2010)          |
| F69  | Rf393  | 206 | F c.1608del               | q.2700875del                 |                       | D    | D-ORF | exon 12   | 11   | -36    | -3     |              |     |     |     |     |                          |                 |           |     |     |               |                                    | PMID: 23143600 (Lemmers, 2010)          |
| F71  | Rf1637 | 4   | F c.2088_2138del          | q.2707585_2707635del         |                       | D    | D-ORF | exon 16   | 8    | -30    | -2     |              |     |     |     |     |                          |                 |           |     |     |               |                                    |                                         |
| F71  | Rf1637 | 5   | F c.2088_2138del          | q.2707585_2707635del         |                       | D    | D-ORF | exon 16   | 10   | -31    | -1     |              |     |     |     |     |                          |                 |           |     |     |               |                                    |                                         |
| F77  | Rf909  | 202 | F c.2665dupA              | q.2724958dup                 |                       | D    | D-ORF | exon 21   | 7    | -22    | 1      |              |     |     |     |     |                          |                 |           |     |     |               |                                    | PMID: 25256356 (Lemmers, HMG 2015)      |
| F77  | Rf909  | 102 | F c.2665dupA              | q.2724958dup                 |                       | D    | D-ORF | exon 21   | 5    | -28    | -3     |              |     |     |     |     |                          |                 |           |     |     |               |                                    | PMID: 25256356 (Lemmers, HMG 2015)      |
| F88  | Rf988  | 3   | M 1.2 Mb deletion SMCHD1  | 1.2 Mb deletion SMCHD1       |                       | D    | D-ORF | exon 12   | 26   | -2     | 2      |              |     |     |     |     |                          |                 |           |     |     |               |                                    | PMID: 25820463 (Lemmers, Hum Mut, 2015) |
| F88  | Rf988  | 4   | F 1.2 Mb deletion SMCHD1  | 1.2 Mb deletion SMCHD1       |                       | D    | D-ORF | exon 12   | 31   | -21    | 0      |              |     |     |     |     |                          |                 |           |     |     |               |                                    | PMID: 25820463 (Lemmers, Hum Mut, 2015) |
| F88  | Rf988  | 5   | M 1.2 Mb deletion SMCHD1  | 1.2 Mb deletion SMCHD1       |                       | D    | D-ORF | exon 12   | 16   | -25    | 5      |              |     |     |     |     |                          |                 |           |     |     |               |                                    | PMID: 25820463 (Lemmers, Hum Mut, 2015) |
| F89  | Rf929  | 3   | F 1.2 Mb deletion SMCHD1  | 1.2 Mb deletion SMCHD1       |                       | D    | D-ORF | exon 12   | 20   | -25    | 7      |              |     |     |     |     |                          |                 |           |     |     |               |                                    | PMID: 25820463 (Lemmers, Hum Mut, 2015) |
| F90  | Rf922  | 2   | F c.412C>T                | q.2667018C>T                 |                       | N    | D-ORF | exon 3    | 12   | -42    | -5     |              |     |     |     |     |                          |                 |           |     |     |               |                                    | PMID: 25256356 (Lemmers, HMG 2015)      |
| F99  | LOVD28 | 2   | F c.1819A>T               | q.2703861A>T                 |                       | N    | D-ORF | exon 13   | 10   | NA     | NA     |              |     |     |     |     |                          |                 |           |     |     |               |                                    | PMID: 27061275 (Hamanaoka, 2016)        |
| F102 | Rf947  | 3   | M c.2656C>T               | q.2724949C>T                 |                       | N    | D-ORF | exon 21   | 8    | -33    | -3     | rs201632358  |     |     |     |     |                          |                 |           |     |     |               |                                    |                                         |
| F102 | Rf947  | 2   | F c.2656C>T               | q.2724949C>T                 |                       | N    | D-ORF | exon 21   | 13   | -26    | 3      | rs201632358  |     |     |     |     |                          |                 |           |     |     |               |                                    |                                         |
| F107 | Rf1727 | 1   | F c.3631C>T               | q.2740817C>T                 |                       | N    | D-ORF | exon 28   | 13   | -31    | 1      |              |     |     |     |     |                          |                 |           |     |     |               |                                    |                                         |
| F108 | Rf1552 | 201 | M c.4267C>T               | q.2751377C>T                 |                       | N    | D-ORF | exon 33   | 17   | -27    | 5      |              |     |     |     |     |                          |                 |           |     |     |               |                                    |                                         |
| F108 | Rf1552 | 102 | F c.4267C>T               | q.2751377C>T                 |                       | N    | D-ORF | exon 33   | 17   | -25    | 6      |              |     |     |     |     |                          |                 |           |     |     |               |                                    |                                         |
| F113 | Rf400  | 4   | M c.5383C>T               | q.2777820C>T                 |                       | N    | D-ORF | exon 43   | 18   | -33    | 3      | rs867694014  |     |     |     |     |                          |                 |           |     |     |               |                                    |                                         |
| F115 | Rf629  | 2   | F c.5602C>T               | q.2784502C>T                 |                       | N    | D-ORF | exon 45   | 8    | -24    | 1      | rs1229050345 |     |     |     |     |                          |                 |           |     |     |               |                                    | PMID: 25256356 (Lemmers, HMG 2015)      |
| F115 | Rf629  | 3   | M c.5602C>T               | q.2784502C>T                 |                       | N    | D-ORF | exon 45   | 3    | -26    | -3     | rs1229050345 |     |     |     |     |                          |                 |           |     |     |               |                                    | PMID: 25256356 (Lemmers, HMG 2015)      |
| F115 | Rf629  | 4   | M c.5602C>T               | q.2784502C>T                 |                       | N    | D-ORF | exon 45   | 8    | -21    | 2      | rs1229050345 |     |     |     |     |                          |                 |           |     |     |               |                                    | PMID: 25256356 (Lemmers, HMG 2015)      |
| F115 | Rf629  | 5   | M c.5602C>T               | q.2784502C>T                 |                       | N    | D-ORF | exon 45   | 8    | NA     | NA     | rs1229050345 |     |     |     |     |                          |                 |           |     |     |               |                                    |                                         |
| F115 | Rf629  | 10  | F c.5602C>T               | q.2784502C>T                 |                       | N    | D-ORF | exon 45   | 14   | -26    | 3      | rs1229050345 |     |     |     |     |                          |                 |           |     |     |               |                                    |                                         |
| F115 | Rf629  | 11  | F c.5602C>T               | q.2784502C>T                 |                       | N    | D-ORF | exon 45   | 12   | -28    | 1      | rs1229050345 |     |     |     |     |                          |                 |           |     |     |               |                                    |                                         |
| F115 | Rf629  | 12  | F c.5602C>T               | q.2784502C>T                 |                       | N    | D-ORF | exon 45   | 6    | -29    | -2     | rs1229050345 |     |     |     |     |                          |                 |           |     |     |               |                                    | PMID: 25256356 (Lemmers, HMG 2015)      |
| F118 | LOVD32 | 2   | M c.187_403>A             | q.26861503>A                 |                       | S3   | D-ORF | intron 1  | 10   | NA     | NA     |              |     |     |     |     |                          |                 |           |     |     |               |                                    | PMID: 27061275 (Hamanaoka, 2016)        |
| F121 | Rf744  | 4   | F c.1843_15A>G            | q.2705677A>G                 |                       | S3   | P-ORF | intron 13 | 10   | -34    | -3     |              |     |     |     |     |                          |                 |           |     |     |               |                                    |                                         |
| F124 | Rf549  | 1   | M c.2147_1G>C             | q.2707804G>C                 |                       | S3   | P-ORF | intron 16 | 7    | NA     | NA     |              |     |     |     |     |                          |                 |           |     |     |               |                                    |                                         |
| F129 | Rf1352 | 2   | M c.3634_19A>G            | q.2743740A>G                 |                       | S3   | D-ORF | intron 29 | 4    | -28    | -3     |              |     |     |     |     |                          |                 |           |     |     |               |                                    |                                         |
| F131 | Rf1034 | 4   | F c.4347_238A>G           | q.2760414A>G                 |                       | S3   | D-ORF | intron 34 | 9    | -30    | -1     |              |     |     |     |     |                          |                 |           |     |     |               |                                    | PMID: 25256356 (Lemmers, HMG 2015)      |
| F131 | Rf1034 | 5   | F c.4347_238A>G           | q.2760414A>G                 |                       | S3   | D-ORF | intron 34 | 9    | -30    | -1     |              |     |     |     |     |                          |                 |           |     |     |               |                                    |                                         |
| F131 | Rf1034 | 3   | F c.4347_238A>G           | q.2760414A>G                 |                       | S3   | D-ORF | intron 34 | 29   | -26    | 12     |              |     |     |     |     |                          |                 |           |     |     |               |                                    |                                         |
| F136 | Rf691  | 1   | M c.186+1G>A              | q.2656261G>A                 |                       | S5   | P-ORF | intron 1  | 14   | -31    | 1      |              |     |     |     |     |                          |                 |           |     |     |               |                                    |                                         |
| F136 | Rf691  | 5   | M c.186+1G>A              | q.2656261G>A                 |                       | S5   | P-ORF | intron 1  | 9    | -34    | -3     |              |     |     |     |     |                          |                 |           |     |     |               |                                    |                                         |
| F139 | Rf394  | 301 | F c.873+1G>A              | q.2688746G>A                 |                       | S5   | P-ORF | intron 7  | 10   | -37    | -4     |              |     |     |     |     |                          |                 |           |     |     |               |                                    |                                         |
| F154 | Rf947  | 3   | M c.2700+1G>T             | q.2724994G>T                 |                       | S5   | D-ORF | intron 21 | 8    | -33    | -3     |              |     |     |     |     |                          |                 |           |     |     |               |                                    |                                         |
| F154 | Rf947  | 2   | F c.2700+1G>T             | q.2724994G>T                 |                       | S5   | D-ORF | intron 21 | 13   | -26    | 3      |              |     |     |     |     |                          |                 |           |     |     |               |                                    |                                         |
| F159 | Rf1110 | 3   | F c.3048+2T>C             | q.2729409T>C                 |                       | S5   | P-ORF | intron 24 | 10   | -41    | -6     |              |     |     |     |     |                          |                 |           |     |     |               |                                    | PMID: 24075187 (Sacconi, 2013)          |
| F165 | Rf874  | 3   | F c.3274_3276+1del        | q.2732488_2732491del         |                       | S5   | P-ORF | intron 25 | 12   | -35    | -2     |              |     |     |     |     |                          |                 |           |     |     |               |                                    | PMID: 23143600 (Lemmers, 2010)          |
| F171 | Rf1414 | 4   | F c.3276_3276+4del        | q.2732490_2732494del         |                       | S5   | P-ORF | in        |      |        |        |              |     |     |     |     |                          |                 |           |     |     |               |                                    |                                         |



## Supplementary table 2

Table summarizing the variant analysis in 187 unrelated FSHD2 families (F1-F187), 41 BAMS (B1-B41) families, 58 non-pathogenic variants (C1-C58) and 2 for which the pathogenicity is unclear (X1-X2), with proband in white and family members carrying the variant in grey (column 1). For each individual the family, personal number (nr) and gender (if known) is shown (columns 2, 3 and 4). For each variant, we provide cDNA (based on accession number NM\_015295.2), genomic (based on hg19, GRCh37.p5) and protein (NP\_056110.2) information (columns 5, 6 and 7). Column 8 describes the variant type (M=missense, D=insertion/deletion, N=nonsense, S3/S5 splice site variant at the 3' or 5' and SYN=synonymous). The variants are sorted by type and by position. ORF-disrupting (D-ORF) and ORF-preserving (P-ORF) consequence of the variant and the SMCHD1 exon number is shown in columns 9 and 10. The D4Z4 methylations values; FseI, delta 1 and delta2 for the individual are shown in columns 11,12 and 13. Values that were not determined or could not be calculated were indicated with NA. And for control individuals, variants that were analyzed in multiple individuals showing normal methylation values were marked normal. The dbSNP number and the frequency of the variant in the EXAC database (AFR=African, EUR=European; EAS=East Asian and SAS=South Asian populations) in columns 14-18). For missense variants we evaluated the pathogenic effect by the following prediction algorithms: PolyPhen (from Variant Effect Predictor in Ensemble; column 19), SIFT (from Alamut, column 20) and Align GVGD Class (columns 21, 22 and 23). Each program has a different pathogenicity score. A pathogenic prediction within one of the programs received a score of 1 (marked grey) and a benign prediction a score of 0 (marked white). The total prediction score for all 3 algorithms is shown in column 24, where we highlighted the variants in grey that obtained a false negative prediction (D4Z4 hypomethylation, but total prediction score <2), or a false positive prediction (normal D4Z4 methylation, but total prediction score >1). The last column shows the publication, in which the variant was first described.



|             | Mutation spectrum 2015 <sup>3</sup> |       | other published variants |       | new variants current study |       | total variants |       |
|-------------|-------------------------------------|-------|--------------------------|-------|----------------------------|-------|----------------|-------|
|             | n                                   | %     | n                        | %     | n                          | %     | n              | %     |
| Indel       | 8                                   | 15,7% | 11                       | 20,8% | 16                         | 19,3% | 35             | 18,7% |
| Missense    | 13                                  | 25,5% | 20                       | 37,7% | 21                         | 25,3% | 54             | 28,9% |
| Nonsense    | 5                                   | 9,8%  | 5                        | 9,4%  | 18                         | 21,7% | 28             | 15,0% |
| Splice site | 25                                  | 49,0% | 17                       | 32,1% | 28                         | 33,7% | 70             | 37,4% |
| Total       | 51                                  |       | 53                       |       | 83                         |       | 187            |       |

Supplementary table 3

SMCHD1 variant type for all variants published in our previous study (n=51)<sup>3</sup>, in 12 other publications (n=53, Supplementary table 1)<sup>5-15</sup>, and new variants (n=83) in the current study.

| Distribution        | ATPase domain | %     | Remaining protein | %     | P value           | Total |
|---------------------|---------------|-------|-------------------|-------|-------------------|-------|
| Exons               | 3-12          |       | 1-2 / 13-48       |       |                   |       |
| Amino acids         | 445           | 22,2% | 1560              | 77,8% | NA                | 2005  |
| Indels <sup>1</sup> | 10            | 28,6% | 25                | 71,4% | 0,49              | 35    |
| Missense            | 27            | 50,0% | 27                | 50,0% | 3,61E-06          | 54    |
| Nonsense            | 7             | 25,0% | 21                | 75,0% | 0,90              | 28    |
| Splicing (S3)       | 1             | 5,9%  | 17                | 94,4% | 0.16 <sup>2</sup> | 182   |
| Splicing (S5)       | 8             | 15,4% | 44                | 84,6% | 0,32              | 52    |
|                     |               |       |                   |       |                   | 351   |

<sup>1</sup> Complete gene deletions were not included

<sup>2</sup> Chi-squared approximation may be incorrect

#### Supplementary table 4

Distribution of the 187 FSHD2-related SMCHD1 variants in the C-terminal extended ATPase domain and in the rest of the protein. C-terminal extended ATPase domain is based on Gordon et al. 2017.<sup>16</sup> In contrast to the other variant types, we observe a significant enrichment (P value 1.59E-05) of missense variants in the extended ATPase domain compared with the size (445/2005 amino acids) of this region.

| Proband ID | Sex | cDNA      | Protein | Exon | Inheritance       | PMID publication                               |
|------------|-----|-----------|---------|------|-------------------|------------------------------------------------|
| K1         | F   | c.320T>C  | L107P   | 3    | NA                | 28067909 <sup>17</sup>                         |
| D1         | M   | c.386T>A  | M129K   | 3    | NA                | 28067909 <sup>17</sup>                         |
| New        | F   | c.386T>G  | M129R   | 3    | NA                | new                                            |
| 11         | F   | c.400G>T  | A134S   | 3    | de novo           | 28067911 <sup>16</sup>                         |
| 12         | F   | c.400G>T  | A134S   | 3    | de novo           | 28067911 <sup>16</sup>                         |
| M1 and 2*  | F   | c.403A>T  | S135C   | 3    | de novo           | 28067909 <sup>17</sup> /28067911 <sup>16</sup> |
| AF1 and 4* | F   | c.403A>T  | S135C   | 3    | de novo           | 28067909 <sup>17</sup> /28067911 <sup>16</sup> |
| I1         | M   | c.404 G>A | S135N   | 3    | de novo           | 28067909 <sup>17</sup>                         |
| R1         | F   | c.404G>A  | S135N   | 3    | Probably familial | 28067909 <sup>17</sup>                         |
| 3          | M   | c.404G>A  | S135N   | 3    | de novo           | 28067911 <sup>16</sup>                         |
| AK1        | M   | c.404G>T  | S135I   | 3    | de novo           | 28067909 <sup>17</sup>                         |
| 1          | M   | c.407A>G  | E136G   | 3    | de novo           | 28067911 <sup>16</sup>                         |
| T1         | M   | c.408A>C  | E136D   | 3    | Paternal          | 28067909 <sup>17</sup>                         |
| AG1        | F   | c.410 G>A | G137E   | 3    | NA                | 28067909 <sup>17</sup>                         |
| A1         | F   | c.415A>C  | N139H   | 3    | de novo           | 28067909 <sup>17</sup>                         |
| Y1         | F   | c.415A>C  | N139H   | 3    | NA                | 28067909 <sup>17</sup>                         |
| C1         | M   | c.423G>C  | L141F   | 3    | NA                | 28067909 <sup>17</sup>                         |
| E1         | M   | c.423G>C  | L141F   | 3    | NA                | 28067909 <sup>17</sup>                         |
| S1         | F   | c.423G>C  | L141F   | 3    | NA                | 28067909 <sup>17</sup>                         |
| V1         | M   | c.423G>T  | L141F   | 3    | de novo           | 28067909 <sup>17</sup>                         |
| AB1        | M   | c.511T>G  | F171V   | 5    | Probably familial | 28067909 <sup>17</sup>                         |
| AA1        | M   | c.725C>G  | A242G   | 6    | de novo           | 28067909 <sup>17</sup>                         |
| 10         | F   | c.1025G>C | W342S   | 8    | de novo           | 28067911 <sup>16</sup>                         |
| O1         | F   | c.1034A>G | Q345R   | 8    | Maternal          | 28067909 <sup>17</sup>                         |
| F1         | M   | c.1043A>G | H348R   | 9    | NA                | 28067909 <sup>17</sup>                         |
| L1 and 13* | F   | c.1043A>G | H348R   | 9    | NA                | 28067909 <sup>17</sup> /28067911 <sup>16</sup> |
| N1 and 5*  | M   | c.1043A>G | H348R   | 9    | de novo           | 28067909 <sup>17</sup> /28067911 <sup>16</sup> |
| X1         | F   | c.1043A>G | H348R   | 9    | de novo           | 28067909 <sup>17</sup>                         |
| Z1         | M   | c.1043A>G | H348R   | 9    | NA                | 28067909 <sup>17</sup>                         |
| AC1        | M   | c.1043A>G | H348R   | 9    | de novo           | 28067909 <sup>17</sup>                         |
| AE1        | M   | c.1043A>G | H348R   | 9    | de novo           | 28067909 <sup>17</sup>                         |
| 14         | F   | c.1043A>G | H348R   | 9    | NA                | 28067911 <sup>16</sup>                         |
| AH1        | F   | c.1199A>T | Q400L   | 10   | Paternal          | 28067909 <sup>17</sup>                         |
| P1 and 6*  | M   | c.1259A>T | D420V   | 10   | de novo           | 28067909 <sup>17</sup> /28067911 <sup>16</sup> |
| 9          | M   | c.1259A>T | D420V   | 10   | de novo           | 28067911 <sup>16</sup>                         |
| W1         | M   | c.1417G>C | E473Q   | 11   | NA                | 28067909 <sup>17</sup>                         |
| 8          | F   | c.1552A>G | K518E   | 12   | NA                | 28067911 <sup>16</sup>                         |
| J1         | M   | c.1568C>A | T523K   | 12   | NA                | 28067909 <sup>17</sup>                         |
| U1         | F   | c.1568C>A | T523K   | 12   | NA                | 28067909 <sup>17</sup>                         |
| B1         | M   | c.1571A>G | N524S   | 12   | NA                | 28067909 <sup>17</sup>                         |
| AJ1 and 7* | M   | c.1655G>A | R552Q   | 13   | de novo           | 28067909 <sup>17</sup> /28067911 <sup>16</sup> |

Supplementary table 5

Overview of SMCHD1 variants identified in 41 BAMS families from previous publications.<sup>16, 17</sup> The 1<sup>st</sup> and 2<sup>nd</sup> columns show the reference ID and gender of the proband. The 3<sup>rd</sup>, 4<sup>th</sup> and 5<sup>th</sup> columns shows the position of the variant in the cDNA, the protein and the exon and whether the variants occurred de novo, or not. The PMID of the publication describing the family is shown in the last column.

## Supplementary Figures

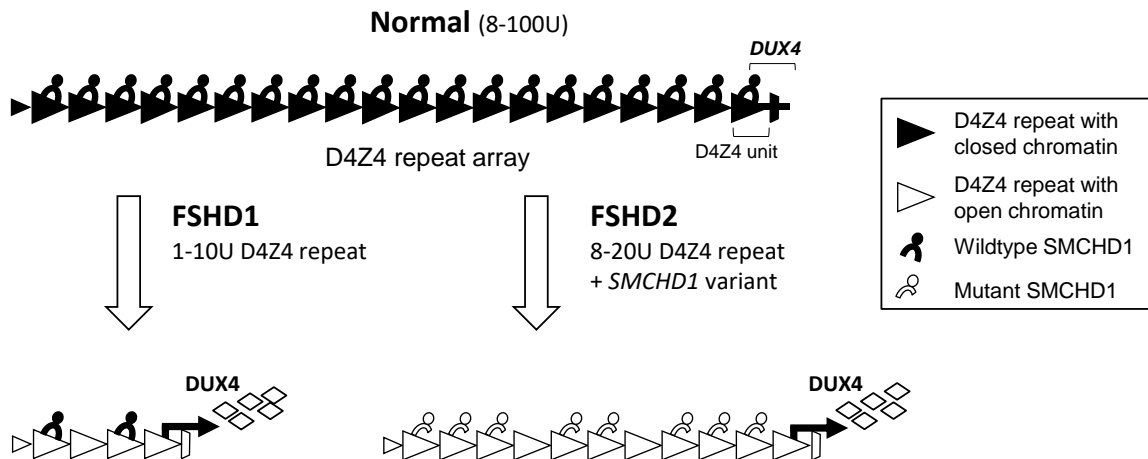

Supplementary figure 1

FSHD is caused by mis-expression of the transcription factor DUX4 in skeletal muscle, where it is normally repressed. A complete copy of the DUX4 retrogene is embedded in the most distal unit of the D4Z4 macrosatellite repeat on chromosome 4 and the region immediately distal to the repeat. In control individuals the repeat varies between 8-100 units, In most FSHD cases, the disease is caused by a D4Z4 repeat contraction to a size of 1-10 units (FSHD1). The less common form FSHD2 is caused by heterozygous variants in the chromatin modifier SMCHD1 in combination with a D4Z4 repeat of 8-20 units, also resulting in DUX4 expression in skeletal muscle. Individual D4Z4 units are depicted as open and filled (representing open and closed chromatin structure) triangles, DUX4 protein expression is indicated with diamonds. Wildtype and mutant SMCHD1 protein are indicated with a closed and open symbol, respectively.

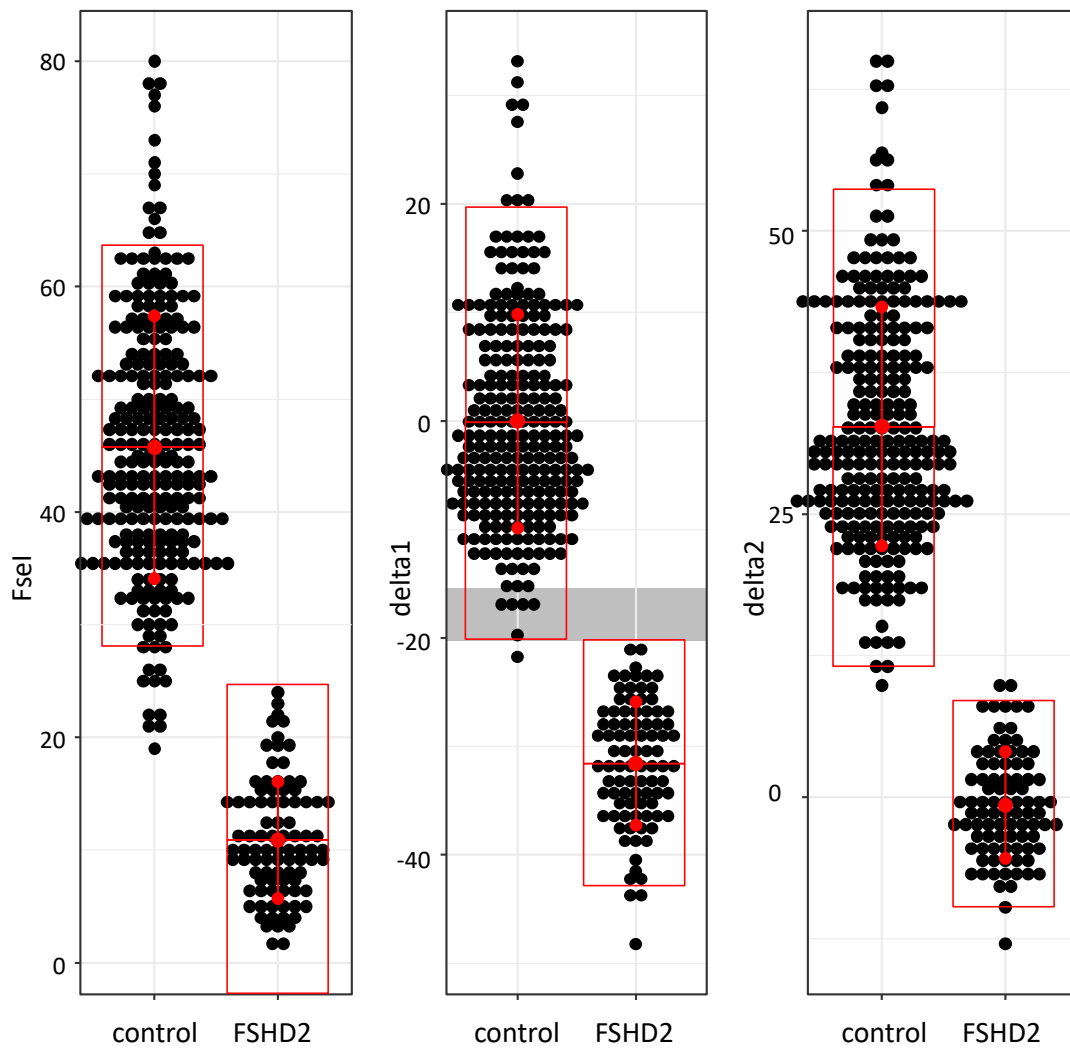

Supplementary figure 2

Threshold methylation values for control individuals (n=249) and for unrelated FSHD2 patients in this study (n=89). The red vertical line with dots indicates the average methylation and 1 SD, while the red box indicates the control and FSHD2 threshold for the different methylation values (1.5 or 2 SD). The FseI methylation value shows the highest variability due to the contribution of the D4Z4 repeat size. The average methylation in controls is 46.8% with a SD of 14.1% and the threshold for FSHD2 is defined at 25% (1.5 SD below the average). The delta1 value has an average value in controls of 0% with an SD of 10.0% and the threshold for FSHD2 is defined at -20.0% (2 SD below the average). We also define a delta1 grey zone between -15.0% to -20.0% where the milder methylation defect might occur due to variants in unknown epigenetic modifiers. The delta2 value is only valid for SMCHD1 mutation carriers. The average is -0.7% and the standard deviation is 4.7%.

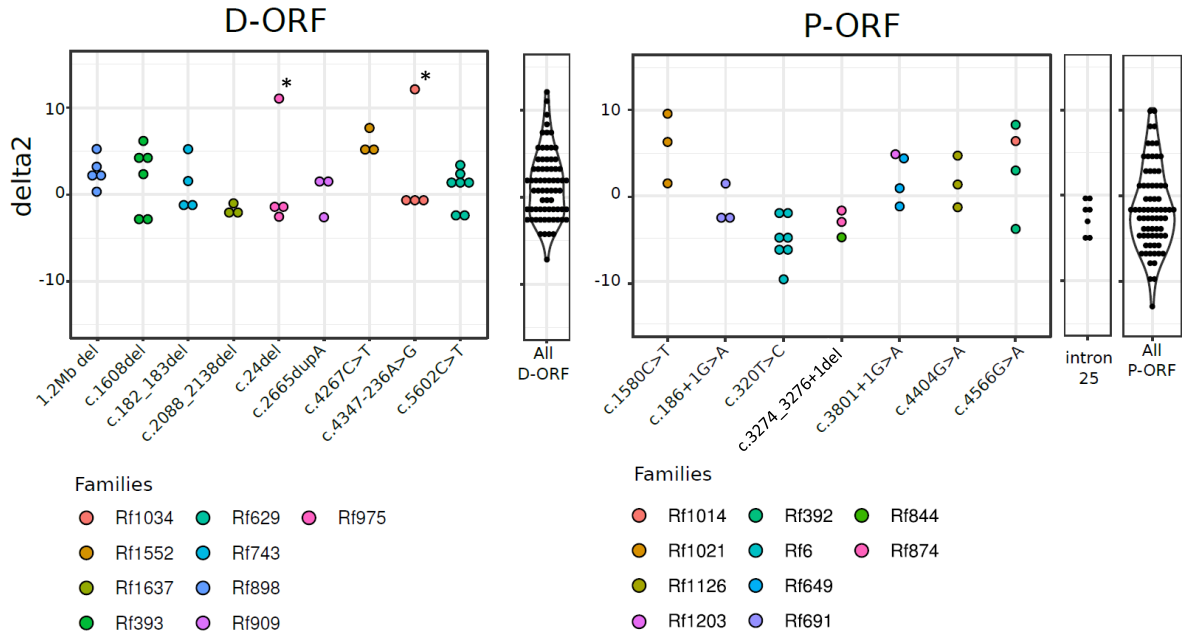

Supplementary figure 3

Delta2 methylation values for carriers of the same SMCHD1 variant in comparison to the distribution of all carriers of a disrupting ORF (D-ORF, left) or preserving ORF (P-ORF, right) variant. For most variants the methylation level of different carriers is comparable. Also different intron 25 variants which probably all result in the skip of exon 25 have a comparable delta2 methylation value (P-ORF, right). Individuals with exceptionally high D4Z4 methylation levels discussed in the text are marked with an asterisk.

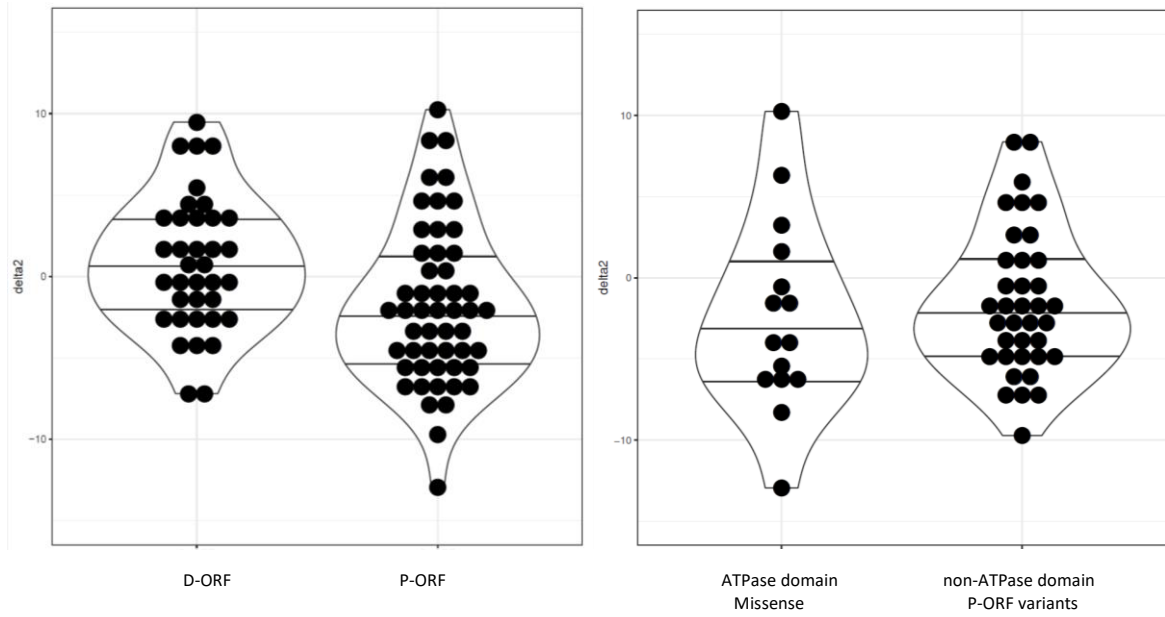

Supplementary figure 4

Violin plot with delta2 methylation values for unrelated carriers of an D-ORF or P-ORF SMCHD1 variant (left) and for ATPase domain P-ORF missense variants and the other P-ORF variants (right). The lines indicate the average, the 25th and 75th percentiles.

## Rf668

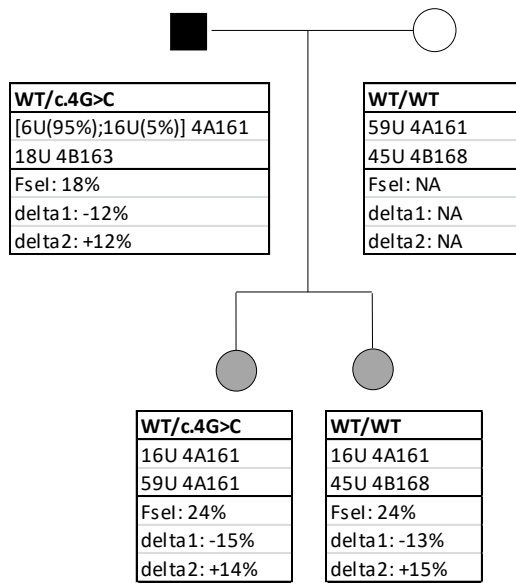

### Supplementary figure 5

Pedigree of family Rf668. Father and both daughters have an Fsel methylation below the FSHD2 threshold and low, but normal, delta1 scores. The father and oldest daughter are heterozygous for the SMCHD1 variant A2P, while the youngest daughter does not carry the variant. The first column shows information on the SMCHD1 variant, the 2<sup>nd</sup> and 3<sup>rd</sup> columns show repeat size and haplotype of both D4Z4 alleles at chromosome 4. The other columns show information on the Fsel, delta1 and delta2 methylation values.



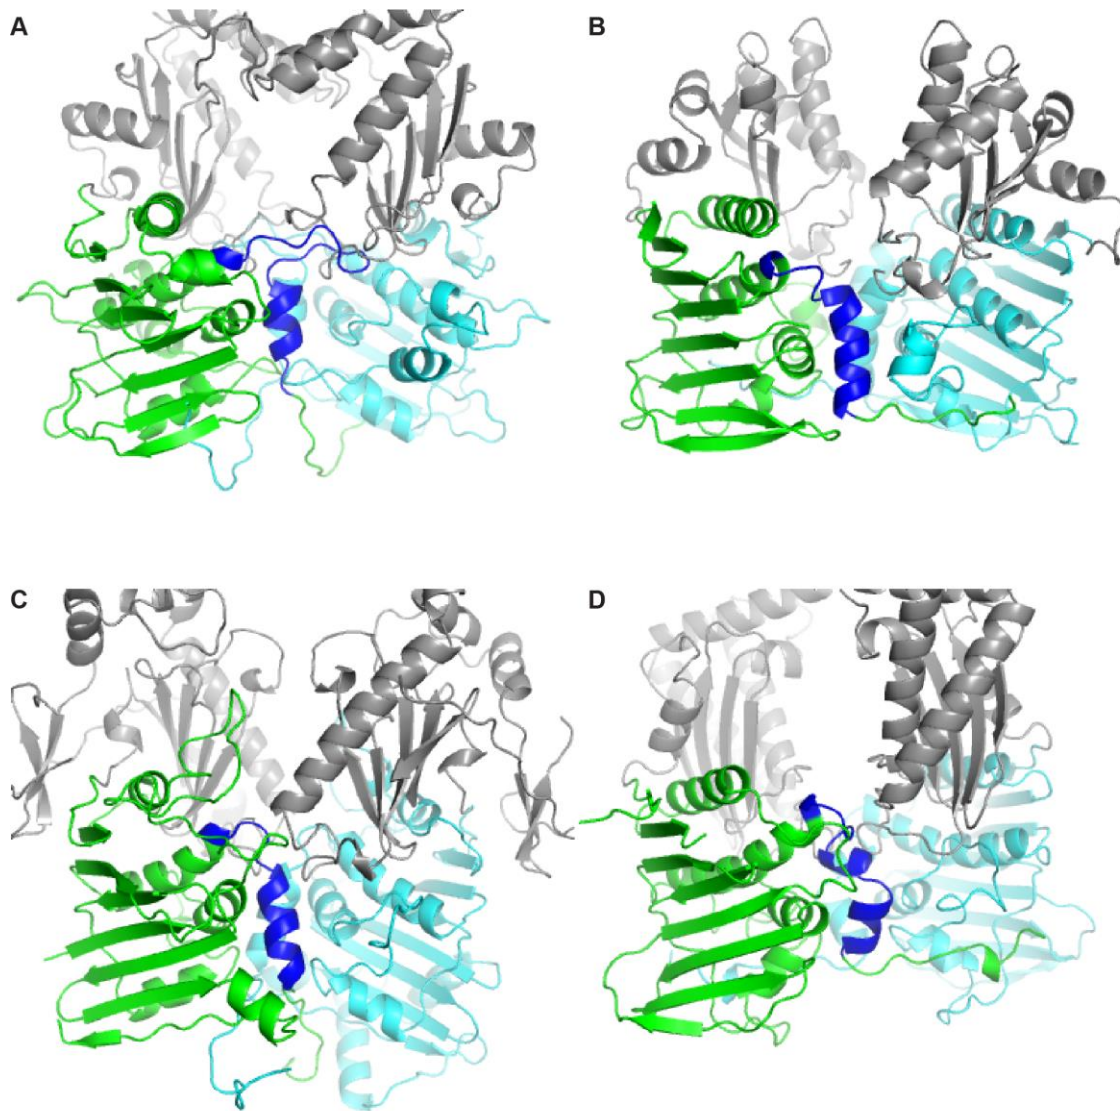

Supplementary figure 6

Comparison of four GHKL ATPase dimers and their downstream ,or C-terminal extended, domains. (A) Computational model of SMCHD1, (B) *E. coli* MutL, (C) MORC2 and (D) *Mycobacterium tuberculosis* GyrB. In each panel, the two ATPase domains are colored in green and cyan, with a helix and loop at the dimer interface marked in dark blue. In SMCHD1, several BAMS mutations localize to this loop. Downstream domains (M-domain, transducer domain) are colored in grey. The ATPase domains show strong structural conservation, while the downstream domains show a much greater structural diversity.

## References

1. Lemmers RJ. Analyzing Copy Number Variation Using Pulsed-Field Gel Electrophoresis: Providing a Genetic Diagnosis for FSHD1. *Methods Mol Biol* 2017;1492:107-25.
2. Hartweck LM, Anderson LJ, Lemmers RJ, Dandapat A, Toso EA, Dalton JC, Tawil R, Day JW, van der Maarel SM, Kyba M. A focal domain of extreme demethylation within D4Z4 in FSHD2. *Neurology* 2013;80:392-9.
3. Lemmers RJ, Goeman JJ, van der Vliet PJ, van Nieuwenhuizen MP, Balog J, Vos-Versteeg M, Camano P, Ramos Arroyo MA, Jerico I, Rogers MT, Miller DG, Upadhyaya M, Verschuuren JJ, Lopez de Munain AA, van Engelen BG, Padberg GW, Sacconi S, Tawil R, Tapscott SJ, Bakker B, van der Maarel SM. Inter-individual differences in CpG methylation at D4Z4 correlate with clinical variability in FSHD1 and FSHD2. *Hum Mol Genet* 2015;24:659-69.
4. Team RDC. R: A Language and Environment for Statistical Computing. 2017 [updated 2017]; Available from: <http://www.R-project.org>.
5. Gaillard MC, Puppo F, Roche S, Dion C, Campana ES, Mariot V, Chaix C, Vovan C, Mazaleyrat K, Tasmadjian A, Bernard R, Dumonceaux J, Attarian S, Levy N, Nguyen K, Magdinier F, Bartoli M. Segregation between SMCHD1 mutation, D4Z4 hypomethylation and Facio-Scapulo-Humeral Dystrophy: a case report. *BMC Med Genet* 2016;17:66.
6. Hamanaka K, Goto K, Arai M, Nagao K, Obuse C, Noguchi S, Hayashi YK, Mitsuhashi S, Nishino I. Clinical, muscle pathological, and genetic features of Japanese facioscapulohumeral muscular dystrophy 2 (FSHD2) patients with SMCHD1 mutations. *Neuromuscul Disord* 2016;26:300-8.
7. Larsen M, Rost S, El HN, Ferbert A, Deschauer M, Walter MC, Schoser B, Tacik P, Kress W, Muller CR. Diagnostic approach for FSHD revisited: SMCHD1 mutations cause FSHD2 and act as modifiers of disease severity in FSHD1. *Eur J Hum Genet* 2014; 23:808-16.
8. Lemmers RJ, Tawil R, Petek LM, Balog J, Block GJ, Santen GW, Amell AM, van der Vliet PJ, Almomani R, Straasheijm KR, Krom YD, Klooster R, Sun Y, den Dunnen JT, Helmer Q, Donlin-Smith CM, Padberg GW, van Engelen BG, de Greef JC, Aartsma-Rus AM, Frants RR, de VM, Desnuelle C, Sacconi S, Filippova GN, Bakker B, Bamshad MJ, Tapscott SJ, Miller DG, van der Maarel SM. Digenic inheritance of an SMCHD1 mutation and an FSHD-permissive D4Z4 allele causes facioscapulohumeral muscular dystrophy type 2. *Nat Genet* 2012;44:1370-4.
9. Lemmers RJ, van den Boogaard ML, van der Vliet PJ, Donlin-Smith CM, Nations SP, Ruivenkamp CA, Heard P, Bakker B, Tapscott S, Cody JD, Tawil R, van der Maarel SM. Hemizyosity for SMCHD1 in Facioscapulohumeral Muscular Dystrophy Type 2: Consequences for 18p Deletion Syndrome. *Hum Mutat* 2015;36:679-83.
10. Mitsuhashi S, Boyden SE, Estrella EA, Jones TI, Rahimov F, Yu TW, Darras BT, Amato AA, Folkert RD, Jones PL, Kunkel LM, Kang PB. Exome sequencing identifies a novel SMCHD1 mutation in facioscapulohumeral muscular dystrophy 2. *Neuromuscul Disord* 2013;23:975-80.
11. Mul K, Lemmers RJLF, Kriek M, van der Vliet PJ, van den Boogaard ML, Badrising UA, Graham JM, Jr., Lin AE, Brand H, Moore SA, Johnson K, Evangelista T, Topf A, Straub V, Kapetanovic GS, Sacconi S, Tawil R, Tapscott SJ, Voermans NC, van Engelen BGM, Horlings CGC, Shaw ND, van der Maarel SM. FSHD type 2 and Bosma arhinia microphthalmia syndrome: Two faces of the same mutation. *Neurology* 2018;91:e562-e70.
12. Nguyen K, Puppo F, Roche S, Gaillard MC, Chaix C, Lagarde A, Pierret M, Vovan C, Olschwang S, Salort-Campana E, Attarian S, Bartoli M, Bernard R, Magdinier F, Levy N. Molecular combing

reveals complex 4q35 rearrangements in Facioscapulohumeral dystrophy. *Hum Mutat* 2017;38:1432-41.

13. Sacconi S, Lemmers RJ, Balog J, van der Vliet PJ, Lahaut P, van Nieuwenhuizen MP, Straasheijm KR, Debipersad RD, Vos-Versteeg M, Salviati L, Casarin A, Pegoraro E, Tawil R, Bakker E, Tapscott SJ, Desnuelle C, van der Maarel SM. The FSHD2 gene SMCHD1 is a modifier of disease severity in families affected by FSHD1. *Am J Hum Genet* 2013;93:744-51.

14. van den Boogaard ML, Lemmers RJ, Camano P, van der Vliet PJ, Voermans N, van Engelen BG, Lopez de MA, Tapscott SJ, van der Stoep N, Tawil R, van der Maarel SM. Double SMCHD1 variants in FSHD2: the synergistic effect of two SMCHD1 variants on D4Z4 hypomethylation and disease penetrance in FSHD2. *Eur J Hum Genet* 2016;24:78-85.

15. Winston J, Duerden L, Mort M, Frayling IM, Rogers MT, Upadhyaya M. Identification of two novel SMCHD1 sequence variants in families with FSHD-like muscular dystrophy. *Eur J Hum Genet* 2015;23:67-71.

16. Gordon CT, Xue S, Yigit G, Filali H, Chen K, Rosin N, Yoshiura KI, Oufadem M, Beck TJ, McGowan R, Magee AC, Altmuller J, Dion C, Thiele H, Gurzau AD, Nurnberg P, Meschede D, Muhlbauer W, Okamoto N, Varghese V, Irving R, Sigaudy S, Williams D, Ahmed SF, Bonnard C, Kong MK, Ratbi I, Fejjal N, Fikri M, Elalaoui SC, Reigstad H, Bole-Feysot C, Nitschke P, Ragge N, Levy N, Tuncbilek G, Teo AS, Cunningham ML, Sefiani A, Kayserili H, Murphy JM, Chatdokmaiprai C, Hillmer AM, Wattanasirichaigoon D, Lyonnet S, Magdinier F, Javed A, Blewitt ME, Amiel J, Wollnik B, Reversade B. De novo mutations in SMCHD1 cause Bosma arhinia microphthalmia syndrome and abrogate nasal development. *Nat Genet* 2017;49:249-55.

17. Shaw ND, Brand H, Kupchinsky ZA, Bengani H, Plummer L, Jones TI, Erdin S, Williamson KA, Rainger J, Stortchevoi A, Samocha K, Currall BB, Dunican DS, Collins RL, Willer JR, Lek A, Lek M, Nassan M, Pereira S, Kammin T, Lucente D, Silva A, Seabra CM, Chiang C, An Y, Ansari M, Rainger JK, Joss S, Smith JC, Lippincott MF, Singh SS, Patel N, Jing JW, Law JR, Ferraro N, Verloes A, Rauch A, Steindl K, Zweier M, Scheer I, Sato D, Okamoto N, Jacobsen C, Tryggestad J, Chernausek S, Schimmenti LA, Bresseur B, Cesaretti C, Garcia-Ortiz JE, Buitrago TP, Silva OP, Hoffman JD, Muhlbauer W, Ruprecht KW, Loeys BL, Shino M, Kaindl AM, Cho CH, Morton CC, Meehan RR, van H, V, Liao EC, Balasubramanian R, Hall JE, Seminara SB, Macarthur D, Moore SA, Yoshiura KI, Gusella JF, Marsh JA, Graham JM, Jr., Lin AE, Katsanis N, Jones PL, Crowley WF, Jr., Davis EE, Fitzpatrick DR, Talkowski ME. SMCHD1 mutations associated with a rare muscular dystrophy can also cause isolated arhinia and Bosma arhinia microphthalmia syndrome. *Nat Genet* 2017;49:238-48.
